# Supplementary material for: Cyanocobalamin promotes muscle development through the TGF-β signaling pathway
Source: Royal Society of Chemistry journal article supplement (doi:10.1039/d2fo00315e), 2022-01-01
Supplement: d2fo00315e2.pdf [file d2fo00315e2.pdf]

A

Edges:

Edges represent protein-protein associations

associations are meant to be specific and meaningful, i.e. proteins jointly contribute to a shared function; this does not necessarily mean they are physically binding each other.

Known Interactions

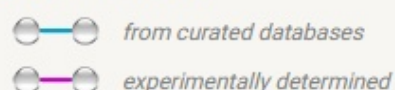

Predicted Interactions

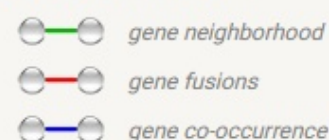

Others

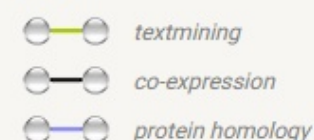

Your Input:

● Cd320

CD320 antigen; Receptor for transcobalamin saturated with cobalamin (TCbl). Plays an important role in cobalamin uptake. Plasma membrane protein that is expressed on follicular dendritic cells (FDC) and mediates interaction with germinal center B cells. Functions as costimulator to promote B cell responses to antigenic stimuli; promotes B cell differentiation and proliferation. Germinal center-B (GC-B) cells differentiate into memory B-cells and plasma cells (PC) through interaction with T-cells and follicular dendritic cells (FDC). CD320 augments the proliferation of PC precursors gen [...] (260 aa)

Neighborhood  
Gene Fusion  
Cooccurrence  
Coexpression  
Experiments  
Databases  
Textmining  
[Homology]  
Score

Predicted Functional Partners:

|          |                                                                                                                                  |   |   |   |   |       |
|----------|----------------------------------------------------------------------------------------------------------------------------------|---|---|---|---|-------|
| ● Tcn2   | Transcobalamin-2; Primary vitamin B12-binding and transport protein. Delivers cobalamin to cells (430 aa)                        | ● | ● | ● | ● | 0.990 |
| ● Bckdk  | [3-methyl-2-oxobutanoate dehydrogenase [lipoamide]] kinase, mitochondrial; Catalyzes the phosphorylation and inactiva...         | ● |   |   | ● | 0.723 |
| ● Lmbrd1 | Probable lysosomal cobalamin transporter; Probable lysosomal cobalamin transporter. Required to export cobalamin fr...           |   |   |   | ● | 0.647 |
| ● Mtr    | Methionine synthase; Catalyzes the transfer of a methyl group from methyl- cobalamin to homocysteine, yielding enzym...          |   |   |   | ● | 0.644 |
| ● Mmd    | Monocyte to macrophage differentiation factor; Involved in the dynamics of lysosomal membranes associated with mic...            |   |   |   | ● | 0.623 |
| ● Igsf8  | Immunoglobulin superfamily member 8; May play a key role in diverse functions ascribed to CD81 and CD9 such as ooc...            |   |   |   | ● | 0.615 |
| ● Abcd4  | ATP-binding cassette sub-family D member 4; May be involved in intracellular processing of vitamin B12 (cobalamin). C...         |   |   |   | ● | 0.612 |
| ● Mmadhc | Methylmalonic aciduria and homocystinuria type D homolog, mitochondrial; Involved in cobalamin metabolism. Plays a ...           |   |   |   | ● | 0.607 |
| ● Acvr1  | Activin receptor type-1; On ligand binding, forms a receptor complex consisting of two type II and two type I transmembr...      |   |   |   | ● | 0.594 |
| ● Cubn   | Cubilin; Cotransporter which plays a role in lipoprotein, vitamin and iron metabolism, by facilitating their uptake. Binds to... | ● | ● |   | ● | 0.590 |

Your Current Organism:

Mus musculus

NCBI taxonomy Id: [10090](#)

Other names: LK3 transgenic mice, M. musculus, Mus muscaris, Mus musculus, Mus sp. 129SV, house mouse, mouse, nude mice, transgenic mice

B

Edges represent protein-protein associations

associations are meant to be specific and meaningful, i.e. proteins jointly contribute to a shared function; this does not necessarily mean they are physically binding each other.

Known Interactions

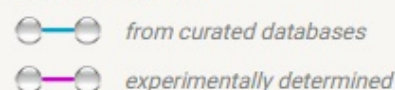

Predicted Interactions

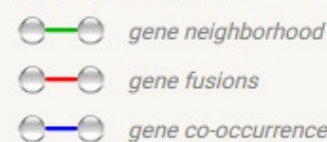

Others

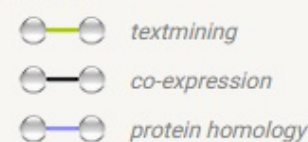

Your Input:

● Acvr1

Activin receptor type-1; On ligand binding, forms a receptor complex consisting of two type II and two type I transmembrane serine/threonine kinases. Type II receptors phosphorylate and activate type I receptors which autophosphorylate, then bind and activate SMAD transcriptional regulators. Receptor for activin. May be involved in left-right pattern formation during embryogenesis (509 aa)

Neighborhood  
Gene Fusion  
Cooccurrence  
Coexpression  
Experiments  
Databases  
Textmining  
[Homology]  
Score

Predicted Functional Partners:

|          |                                                                                                                              |   |   |   |   |       |
|----------|------------------------------------------------------------------------------------------------------------------------------|---|---|---|---|-------|
| ● Bmp4   | Bone morphogenetic protein 4; Induces cartilage and bone formation. Acts in concert with PTHLH/PTHRP to stimulate du...      | ● | ● | ● | ● | 0.983 |
| ● Smad9  | Mothers against decapentaplegic homolog 9; Transcriptional modulator activated by BMP (bone morphogenetic proteins)...       | ● | ● | ● | ● | 0.973 |
| ● Bmp2   | Bone morphogenetic protein 2; Induces cartilage and bone formation. Stimulates the differentiation of myoblasts into ost...  | ● | ● | ● | ● | 0.969 |
| ● Smad5  | Mothers against decapentaplegic homolog 5; Transcriptional modulator activated by BMP (bone morphogenetic proteins)...       | ● | ● | ● | ● | 0.959 |
| ● Smad1  | Mothers against decapentaplegic homolog 1; Transcriptional modulator activated by BMP (bone morphogenetic proteins)...       | ● | ● | ● | ● | 0.959 |
| ● Smad2  | Mothers against decapentaplegic homolog 2; Receptor-regulated SMAD (R-SMAD) that is an intracellular signal transduce...     | ● | ● | ● | ● | 0.956 |
| ● Bmpr2  | Bone morphogenetic protein receptor type-2; On ligand binding, forms a receptor complex consisting of two type II and tw...  | ● | ● | ● | ● | 0.953 |
| ● Smad3  | Mothers against decapentaplegic homolog 3; Receptor-regulated SMAD (R-SMAD) that is an intracellular signal transduce...     | ● | ● | ● | ● | 0.935 |
| ● Acvr2a | Activin receptor type-2A; On ligand binding, forms a receptor complex consisting of two type II and two type I transmembr... | ● | ● | ● | ● | 0.929 |
| ● Acvr2b | Activin receptor type-2B; Transmembrane serine/threonine kinase activin type-2 receptor forming an activin receptor com...   | ● | ● | ● | ● | 0.929 |

Your Current Organism:

Mus musculus

NCBI taxonomy Id: [10090](#)

Other names: LK3 transgenic mice, M. musculus, Mus muscaris, Mus musculus, Mus sp. 129SV, house mouse, mouse, nude mice, transgenic mice
