# Supplementary figures and images for: Cyanocobalamin promotes muscle development through the TGF-β signaling pathway
Source: Royal Society of Chemistry journal article supplement (doi:10.1039/d2fo00315e), 2022-01-01

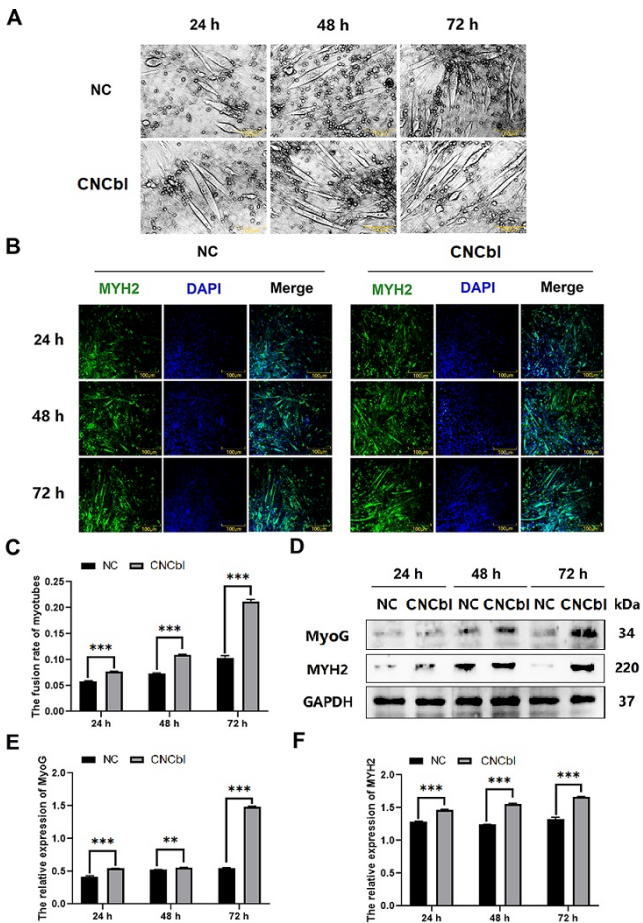

Supplement: d2fo00315e1.pdf [file d2fo00315e1.pdf]
